# Supplementary material for: Inhibition of late sodium current suppresses calcium-related ventricular arrhythmias by reducing the phosphorylation of CaMK-II and sodium channel expressions
Source: PubMed Central journal article supplement (PMC5430524; doi:10.1038/s41598-017-01056-0), 2017-04-20
Supplement: 41598_2017_1056_MOESM1_ESM.pdf [file 41598_2017_1056_MOESM1_ESM.pdf]

**Supplementary information**

**Inhibition of late sodium current suppresses calcium-related  
ventricular arrhythmias by reducing the phosphorylation of CaMK-  
II and sodium channel expressions**

**Xiao-Hong Wei<sup>1,2</sup>, Shan-Dong Yu<sup>1,2</sup>, Lu Ren<sup>1,2</sup>, Si-Hui Huang<sup>1,2</sup>, Qiao-Mei Yang<sup>1,2</sup>, Ping  
Wang<sup>1</sup>, Yan-Peng Chu<sup>1,2</sup>, Wei Yang<sup>1,2</sup>, Yan-Sheng Ding<sup>1,2</sup>, Yong Huo<sup>1,2,\*</sup>, and Lin Wu<sup>1,2,\*</sup>**

<sup>1</sup>Department of Cardiology, Peking University First Hospital, Beijing, 100034, China

<sup>2</sup>Key Laboratory of Molecular Cardiovascular Sciences, Ministry of Education, Beijing, 100191,  
China.

\*Corresponding authors: Lin Wu, wuepgroup@126.com; and Yong Huo, huoyong@263.net.cn.

---

## Methods

### **Myocardial ischemia/reperfusion (I/R) model establishment and myocardial infarct size**

**assessment in rats.** To determine the effect of late sodium current inhibitors on a disease model (myocardial ischemia/reperfusion injury) associated with late sodium current, male Sprague-Dawley rats weighing 240-260 g were subjected to left anterior descending coronary artery (LADCA) occlusion by ligation for 30 min followed by reperfusion for 90 min. Animals were divided into three groups: Sham, I/R model, and ranolazine + I/R. Ranolazine (10  $\mu$ M) was administered by intravenous for 30 min before ischemia, and was continuously administered till the end of reperfusion at a speed of 1 ml/h.

At the end of reperfusion, the LADCA was re-ligated, and 2 ml of 4% Evans blue (Sigma Aldrich, Missouri, USA) was injected into the right femoral vein via intravenous catheter to delineate the area at risk (AAR). Then the heart was excised at a 5 mm level above the apex cordis and sliced transversely into five sections (1 mm thick). The slices were incubated in 0.375% 2,3,5-triphenyltetrazolium chloride (TTC) (AMRESCO, Ohio, USA) at 37 °C for 15 min to identify the infarct size. AAR, infarct size and left ventricle (LV) were determined using Image-Pro Plus 5.0 software (Media Cybernetic, Maryland, USA).

## Results

**Eleclazine decreased the reverse use dependence (RUD) effect of Bay K 8644 on left ventricular epi-MAPD<sub>90</sub>.** As shown in Supplementary Fig. S1, eleclazine exhibited similar effect to TTX on Bay K 8644-induced RUD phenomenon of MAPD<sub>90</sub>. Bay K 8644 (200 nM) prolonged epi-MAPD<sub>90</sub> at all stimulation rates (n=5,  $P < 0.05$ ), and the prolongation was greater at longer cycle length (CL)s (e.g.,  $75.8 \pm 4.4$  ms at a CL of 2000 ms) than at shorter CLs ( $19.6 \pm$

5.2 ms at a CL of 400 ms,  $P < 0.05$ ). In the continued presence of Bay K 8644 in same group of hearts, eleclazine significantly attenuated the RUD of epi-MAPD<sub>90</sub>, especially at longer CLs (n=5,  $P < 0.05$ ).

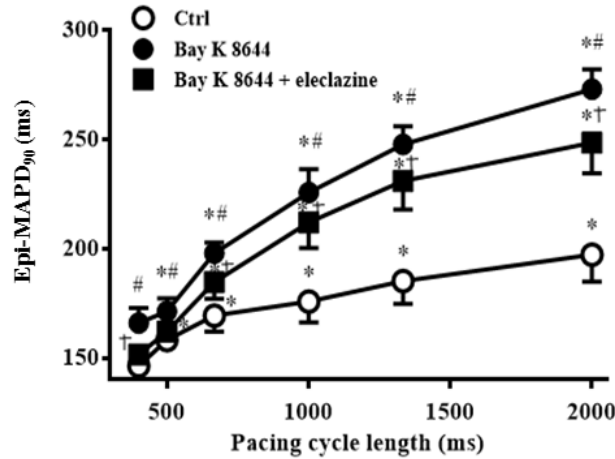

**Supplementary Figure S1. Effects of eleclazine on the RUD of MAPD<sub>90</sub> caused by Bay K 8644.** Values of MAPD<sub>90</sub> were measured in the absence (Ctrl) and presence of Bay K 8644 (200 nM), Bay K 8644 (200 nM) plus eleclazine (n=5). \*  $P < 0.05$  vs. cycle length (CL) of 400 ms; #  $P < 0.05$  vs. Ctrl at the same CL; †  $P < 0.05$  vs. Bay K 8644 alone at the same CL.

**Inhibition of late  $I_{Na}$  by ranolazine (10  $\mu$ M) diminished the infarct size after myocardial I/R.**

As shown in Supplementary Fig. S2, ranolazine caused a reduced ratio of infarct size/AAR in hearts treated compared to that from I/R model (Supplementary Fig. S2, (a) and (c)). However, the ratios of AAR/LV were similar in all three groups, indicating similar tension and placement of the ligature across the three groups (Supplementary Fig. S2(b)).

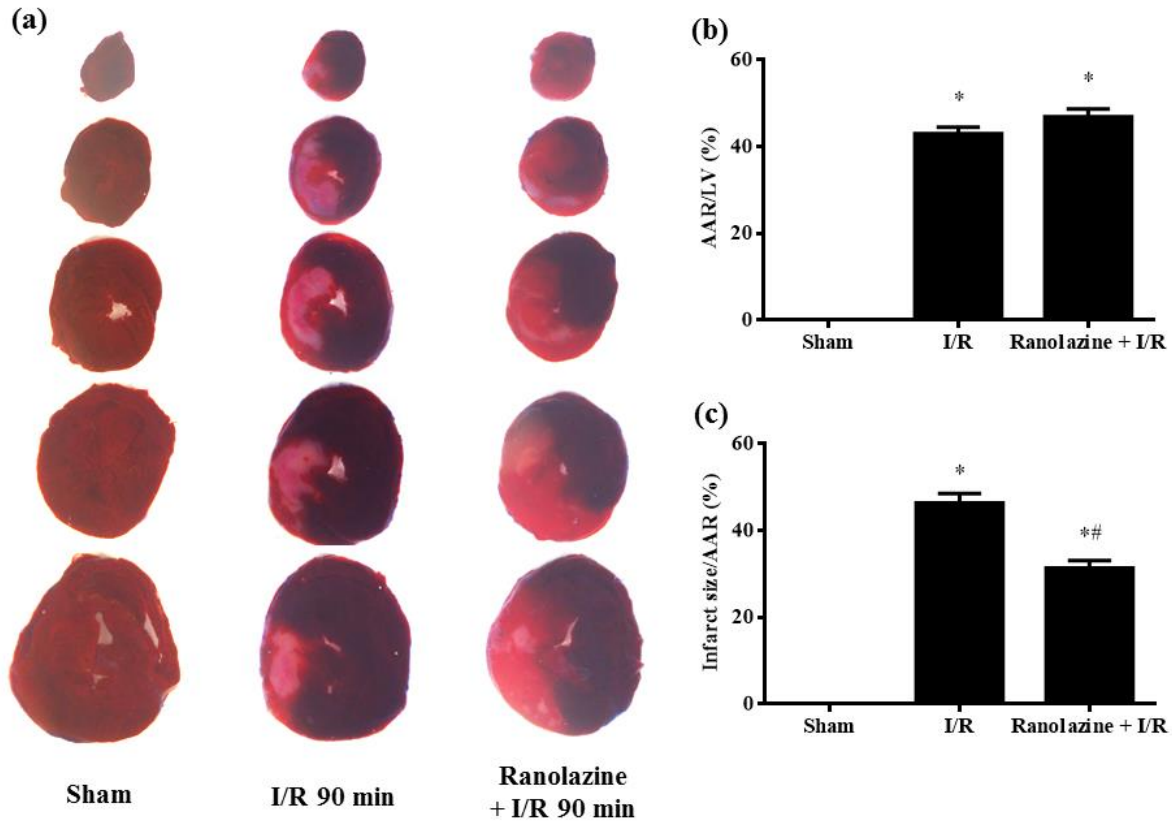

**Supplementary Figure S2. Ranolazine (10  $\mu$ M) reduced the infarct size in hearts with ischemia/reperfusion (I/R) injury.** (a), representative images of Evans blue-TTX staining in Sham, I/R 90 min, and ranolazine plus I/R 90 min. (b) and (c), the statistic results of AAR/LV (b) and Infarct size/AAR (c) among the three groups. AAR: area at risk; LV: left ventricle.  $n=3$ , \* $P < 0.05$  vs. Sham; # $P < 0.05$  vs. I/R 90 min.
